# Supplementary material for: Membrane binding, internalization, and sorting of alpha-synuclein in the cell
Source: PubMed Central journal article supplement (PMC6090819; doi:10.1186/s40478-018-0578-1), 2018-08-14

# Figure S1

## A

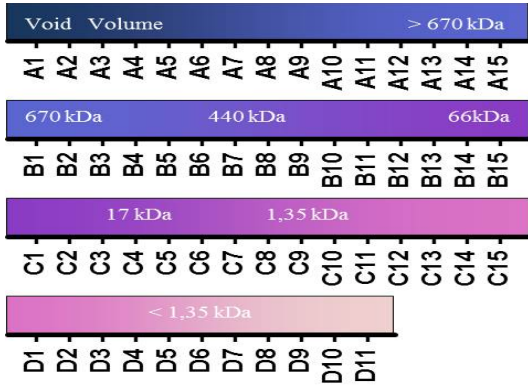

## B

### Chromatogram

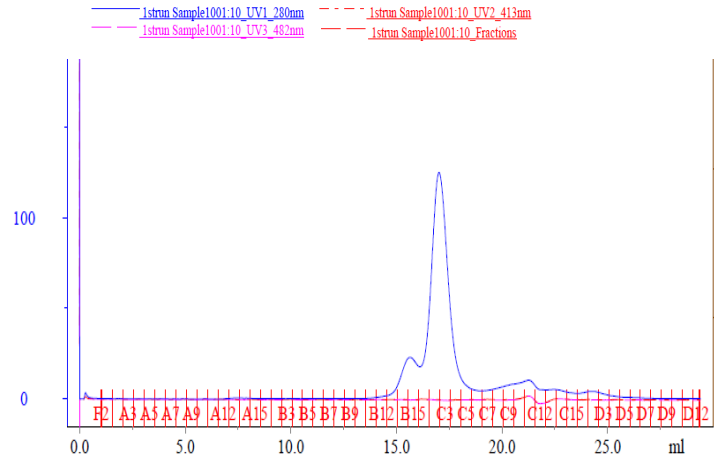

Supplement: 40478_2018_578_MOESM1_ESM.pdf [file 40478_2018_578_MOESM1_ESM.pdf]
