# Supplementary material for: Membrane binding, internalization, and sorting of alpha-synuclein in the cell
Source: PubMed Central journal article supplement (PMC6090819; doi:10.1186/s40478-018-0578-1), 2018-08-14
Supplement: 40478_2018_578_MOESM2_ESM.pdf [file 40478_2018_578_MOESM2_ESM.pdf]

Table S1

| RABs        | Localization                                    | Function                                                | H4 cells + aSyn monomers |                                               | H4 cells + aSyn fibrils |                                               |
|-------------|-------------------------------------------------|---------------------------------------------------------|--------------------------|-----------------------------------------------|-------------------------|-----------------------------------------------|
|             |                                                 |                                                         | Colocalization           | Morphology                                    | Colocalization          | Morphology                                    |
| Rab1A, 1B   | ER, Golgi                                       | ER to Golgi, Intra-Golgi                                | No                       | 11% more RAB-vesicles                         | No                      | 9% more RAB-vesicles                          |
| Rab3A       | Secretory vesicles, plasma membrane             | Exocytosis, neurotransmitter release                    | +                        | 7% more RAB-vesicles                          | +                       | 15% more RAB-vesicles                         |
| Rab4A       | Early endosome                                  | Protein recycling/transport to plasma membrane          | +++                      | 51% more RAB-vesicles                         | No                      | 42% more RAB-vesicles                         |
| Rab5A       | PM, CCVs, early endosome                        | Early endosome fusion                                   | +++                      | 32% more RAB-vesicles                         | No                      | 35% more RAB-vesicles                         |
| Rab6A       | Golgi                                           | Endosome to Golgi, intra-Golgi transport Golgi to ER    | No                       | 46% more RAB-vesicles                         | No                      | 41% more RAB-vesicles                         |
| Rab7        | Late endosome, lysosome, melanosomes, phagosome | Late endosome to lysosome                               | +++                      | 54% more RAB-vesicles                         | No                      | 50% more RAB-vesicles                         |
| Rab9A       | Late endosome                                   | Endosome to TGN                                         | +++                      | No changes in the distribution pattern        | No                      | No changes in the distribution pattern        |
| Rab15       | Early/sorting endosome, recycling endosome      | Sorting endosome/ recycling endosome to plasma membrane | No                       | 40% smaller RAB-vesicles                      | +                       | 23% smaller RAB-vesicles                      |
| Rab25       | Recycling endosome                              | Recycling endosome to plasma membrane                   | No                       | 40% more RAB-vesicles, 15% more cytosolic RAB | No                      | 18% more RAB-vesicles, 48% more cytosolic RAB |
| Rab27B      | Melanosome                                      | Exocytosis                                              | +                        | 41% more RAB-vesicles                         | No                      | 25% more RAB-vesicles                         |
| Rab33A, 33B | Golgi, dense-core vesicles                      | Autophagosome formation                                 | No                       | 18% more RAB-vesicles                         | No                      | 35% more RAB-vesicles                         |
