# Supplementary material for: Membrane binding, internalization, and sorting of alpha-synuclein in the cell
Source: Springer Nature journal article supplement (doi:10.1186/s40478-018-0578-1), 2018-08-14

**A**

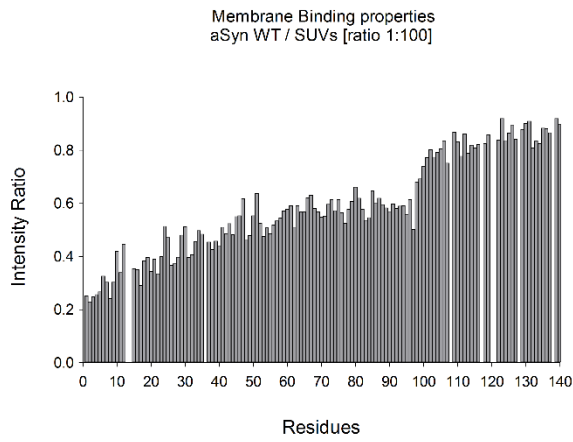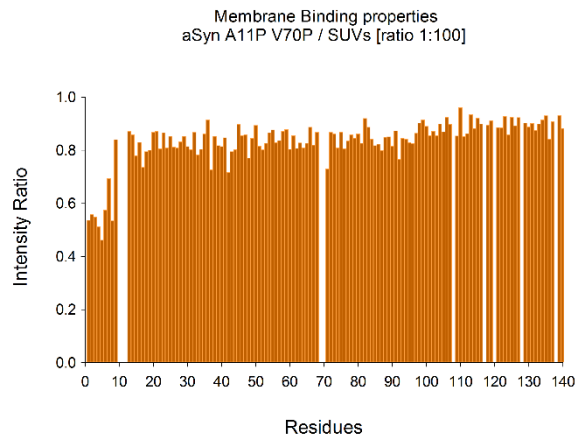

**B**

|                |   |            |            |            |            |            |            |
|----------------|---|------------|------------|------------|------------|------------|------------|
| Rab4A-GFP      | + | -          | +          | +          | -          | +          | +          |
| aSyn WT        | - | +1 $\mu$ M | +1 $\mu$ M | +5 $\mu$ M | -          | -          | -          |
| aSyn A11P/V70P | - | -          | -          | -          | +1 $\mu$ M | +1 $\mu$ M | +5 $\mu$ M |

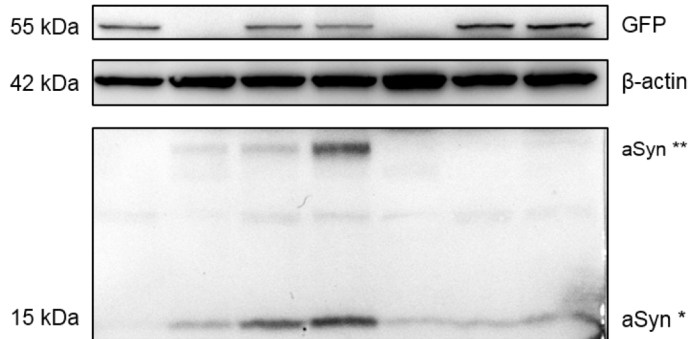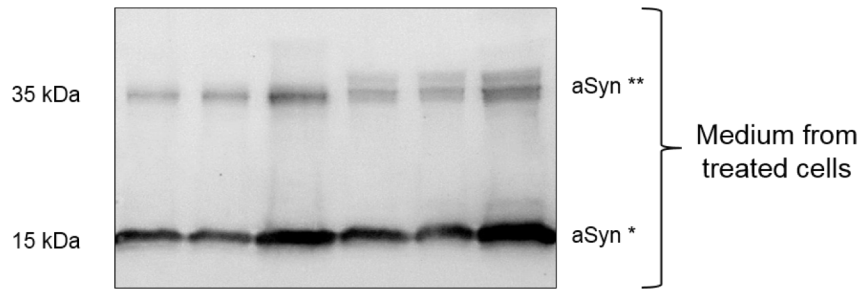

**C**

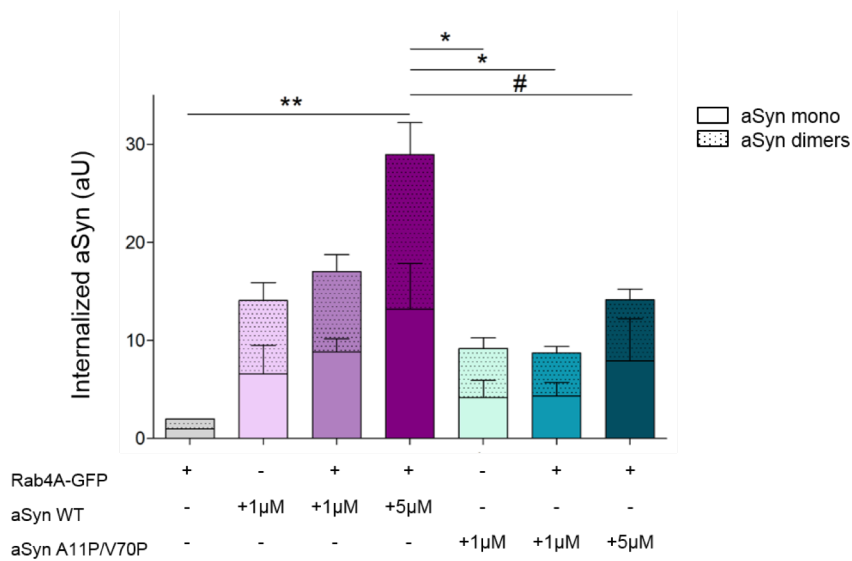

D

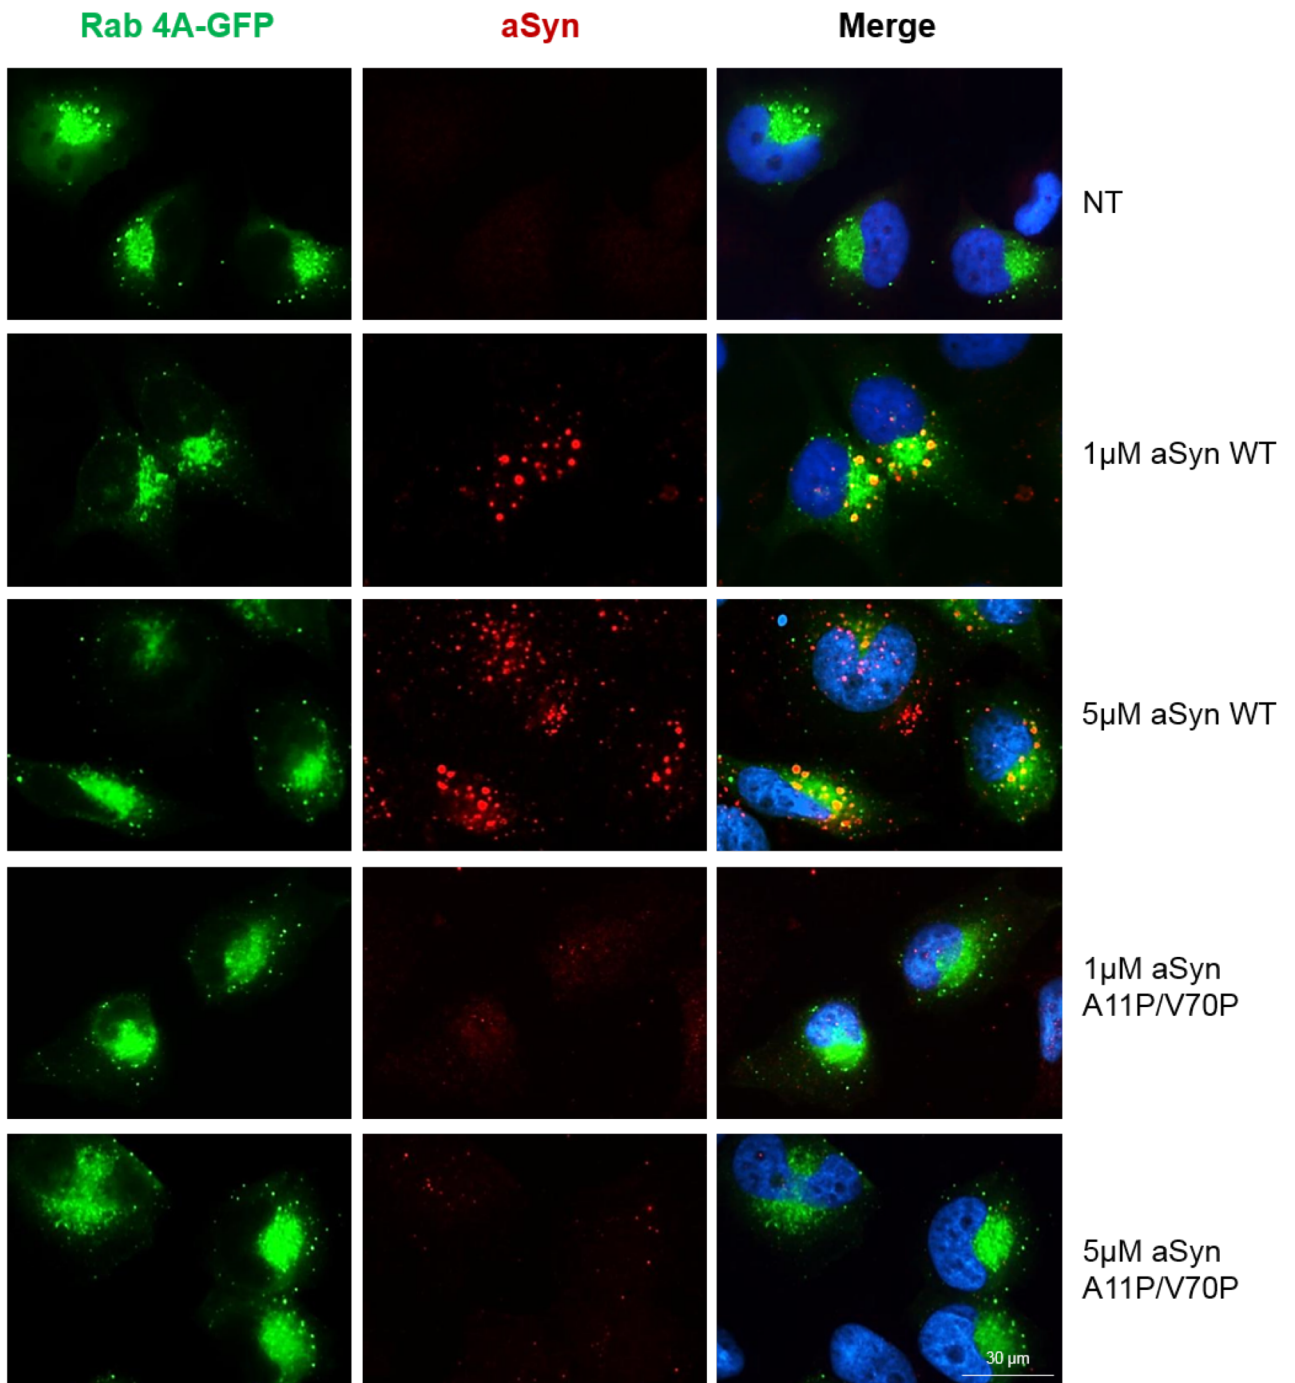

Supplement: MOESM3 [file 25666472]
