# Supplementary material for: Membrane binding, internalization, and sorting of alpha-synuclein in the cell
Source: Springer Nature journal article supplement (doi:10.1186/s40478-018-0578-1), 2018-08-14

**A**

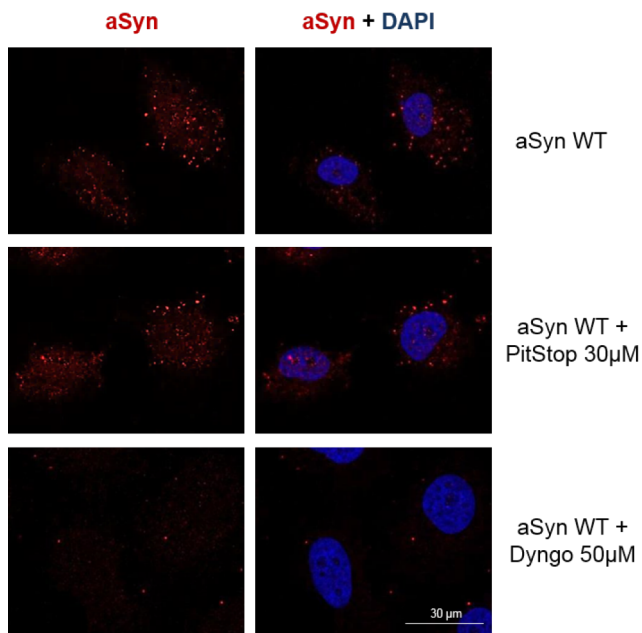

**B**

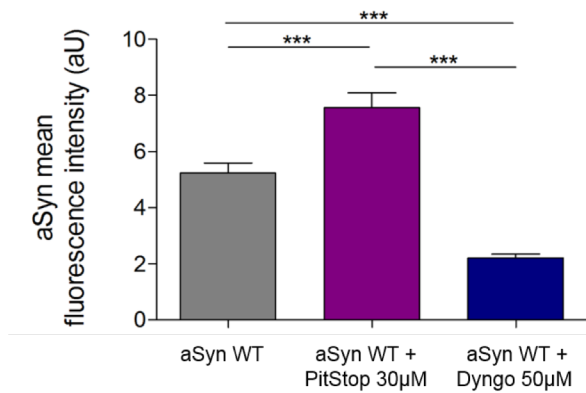

**C**

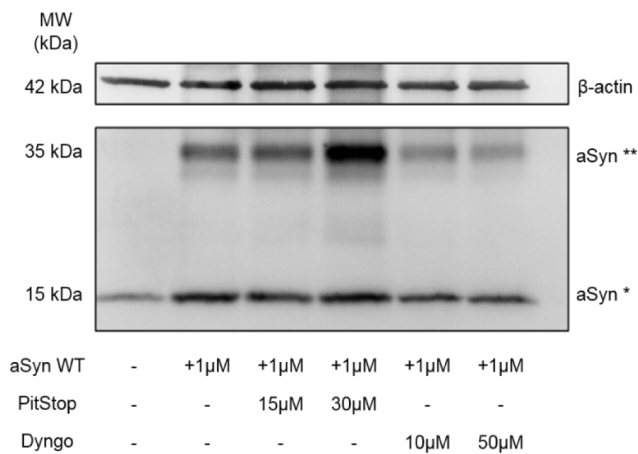

**D**

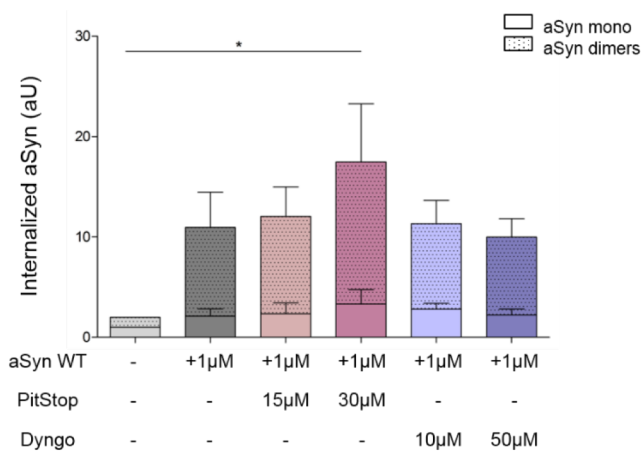

Supplement: MOESM4 [file 25666472]
